## Safety of omitting defibrillation efficacy testing with subcutaneous defibrillators: a propensity matched case-control study

Bianchi V.<sup>1</sup>; Bisignani G.<sup>2</sup>; Russo V.<sup>3</sup>; Migliore F.<sup>4</sup>; Tola G.<sup>5</sup>; Viani S.<sup>6</sup>; Rossi P.<sup>7</sup>; Biffi M.<sup>8</sup>; Palmisano P.<sup>9</sup>; Checchi L.<sup>10</sup>; Licciardello G.<sup>11</sup>; Francia P.<sup>12</sup>; Leidi C.<sup>13</sup>; Ospizio R.<sup>14</sup>; D'Onofrio A.<sup>1</sup>

<sup>1</sup>Ospedale Monaldi, Naples, Italy

<sup>2</sup>Hospital Ferrari, Castrovillari, Italy

<sup>3</sup>Second University of Naples, Naples, Italy

<sup>4</sup>Azienda Ospedaliera di Padova, Padova, Italy

<sup>5</sup>AO Brotzu Hospital, Cagliari, Italy

<sup>6</sup>Azienda Ospedaliero Universitaria Pisana, Pisa, Italy

<sup>7</sup>Giovanni Calibita Fatebenefratelli Hospital, Rome, Italy

<sup>8</sup>Policlinico S. Orsola-Malpighi, Bologna, Italy

<sup>9</sup>Cardinale G. Panico Hospital, Tricase, Italy

<sup>10</sup>Azienda Ospedaliera Universitaria Careggi, Firenze, Italy

<sup>11</sup>Ospedale E. Muscatello, Augusta, Italy

<sup>12</sup>Sant Andrea Hospital, Rome, Italy

<sup>13</sup>Ospedale Papa Giovanni XXIII, Bergamo, Italy

<sup>14</sup>Boston Scientific Italy, Milan, Italy

**Funding Acknowledgements:** Type of funding sources: None.

**Background:** Defibrillation efficacy testing (DT) is recommended at implantation of subcutaneous implantable cardioverter-defibrillators (S-ICD). However, prior works found that adherence to this recommendation is declining in clinical practice.

**Purpose:** To compare survival from all-cause death and first ineffective shock (primary endpoint) and the composite of all-cause death, ineffective shock, inappropriate shock and device-related complication (secondary endpoint) between patients who underwent DT and those with omitted DT.

**Methods:** We analyzed 1652 consecutive patients who underwent S-ICD implantation in 60 Italian centers from 2013 to 2019.

**Results:** DT was not performed in 325 (20%) patients (no-DT patients). As compared with the DT group, these patients were older ( $51 \pm 16$  vs.  $48 \pm 15$  years;  $p < 0.01$ ) and had lower ejection fraction ( $37 \pm 16\%$  vs.  $46 \pm 16\%$ ;  $p < 0.01$ ). The 325 no-DT patients were propensity matched with 325 patients of the DT group. During a median follow up of 19 months, 27 (4.2%) patients died for any-cause. During follow-up, 34 (5.2%) patients received appropriate shocks to treat discrete episodes of VT/VF. The first shock was effective in 30 out of 34 patients (88%), whereas a second shock was required to terminate VT/VF in 3 patients and a third shock in the last one. The primary endpoint occurred in 31 (4.8%) patients, and the risk was not significantly increased in the no-DT cohort (HR = 1.26, 95%CI:0.62-2.55,  $p = 0.522$ ). Inappropriate shocks were reported in 36 (5.5%) patients and device-related complications in 25 (3.8%) patients during follow-up. Survival from the composite secondary endpoint was comparable between groups (HR = 0.86, 95%CI:0.57-1.32,  $p = 0.500$ ).

**Conclusions:** Our data confirmed that DT is frequently omitted in current clinical practice, especially in older patients with worse systolic function. A strategy that omits DT did not appear to compromise the effectiveness of the S-ICD and no additional risk seems associated with DT omission at a mid-term follow-up. These data suggest that routine DT at S-ICD implant might not be necessary. Randomized trials are needed to confirm this finding.
